# Supplementary material
Source: Springer Nature journal article supplement (https://www.springermedizin.de/resource/supplementary/12936_2012_2045_MOESM1_ESM.pdf/9543474)

## Unstable low transmission

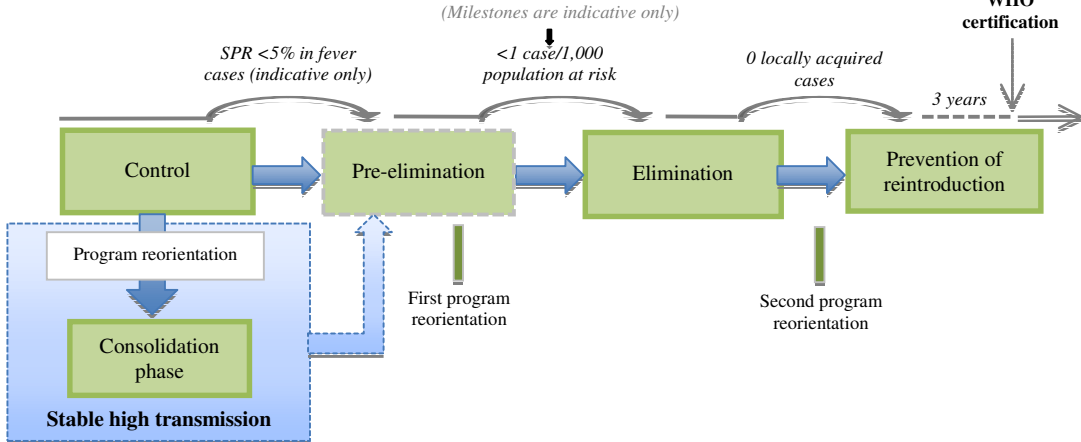

Supplement: MOESM1 [file 9543474]
